# Supplementary material
Source: publisher figshare collection journal article supplement (https://acs.figshare.com/ndownloader/files/31426395)
Supplement: Supplementary file [file 31426395]

## **Supporting Information to**

### **pH dependence of succinimide ester-based protein cross-linking for structural mass spectrometry applications**

Esben Trøjbjerg, Arend Keller and Alexander Leitner\*

Institute of Molecular Systems Biology, Department of Biology, ETH Zurich,  
Switzerland

\* To whom correspondence should be addressed.

## Table of Contents

Page S3: **Table S2.** Over-length cross-linked residue pairs identified at the different pH conditions.

Page S4: **Table S3.** Overview of preparation of the pH buffers.

Page S5: **Figure S1.** Specificity of DSS at different pH conditions.

Page S6: **Figure S2.** SDS-PAGE gel of the cross-linking reaction of the eight model proteins cross-linked at eight different pH conditions.

Page S7: **Figure S3.** Identification of cross-linked peptide pairs at different pH conditions for the eight single investigated proteins.

Page S8: **Figure S4.** Distance distribution of identified unique cross-linked residue pairs from bovine catalase at different pH conditions.

Page S9: **Figure S5.** Distance distribution of identified unique cross-linked residue pairs from rabbit creatine kinase M-type at different pH conditions.

Page S10: **Figure S6.** Distance distribution of identified unique cross-linked residue pairs from rabbit fructose-bisphosphate aldolase A at different pH conditions.

Page S11: **Figure S7.** Distance distribution of identified unique cross-linked residue pairs from bovine serum albumin at different pH conditions.

Page S12: **Figure S8.** Distance distribution of identified unique cross-linked residue pairs from chicken ovotransferrin at different pH conditions.

Page S13: **Figure S9.** Distance distribution of identified unique cross-linked residue pairs from rabbit pyruvate kinase at different pH conditions.

Page S14: **Figure S10.** Distance distribution of identified unique cross-linked residue pairs from bovine lactotransferrin at different pH conditions.

Page S15: **Figure S11.** Distance distribution of identified unique cross-linked residue pairs from bovine serotransferrin at different pH conditions.

Page S16: Relative decrease in the amount of deprotonated lysine side chains at pH 6.0 compared to pH 7.5.

Provided as a separate file in Microsoft Excel format: **Table S1.** Summary of all cross-link identifications.

**Table S2.** Over-length cross-linked residue pairs identified at the different pH conditions.

| pH                                                 | 4.0  | 4.5  | 5.0  | 5.5  | 6.0  | 6.5  | 7.0  | 7.5  |
|----------------------------------------------------|------|------|------|------|------|------|------|------|
| Unique over length cross-link pairs (>30Å)         | 2    | 1    | 3    | 1    | 5    | 2    | 4    | 8    |
| Unique cross link pairs                            | 39   | 40   | 56   | 61   | 84   | 73   | 78   | 119  |
| Percentage over length cross-link pairs (>30Å) (%) | 5.13 | 2.25 | 5.36 | 1.64 | 5.95 | 2.74 | 5.13 | 6.72 |

**Table S3.** Overview of preparation of the pH buffers. To obtain 10.00 ml of the respective pH buffers solutions of 0.1 M citric acid and 0.2 M Na<sub>2</sub>HPO<sub>4</sub> were mixed according to the table below. If necessary, the pH was fine-tuned with either 0.1 M citric acid or 0.2 M Na<sub>2</sub>HPO<sub>4</sub> to obtain the desired pH.

| pH  | 0.1 M citric acid (mL) | 0.2 M Na <sub>2</sub> HPO <sub>4</sub> (mL) |
|-----|------------------------|---------------------------------------------|
| 4.0 | 6.145                  | 3.855                                       |
| 4.5 | 5.457                  | 4.543                                       |
| 5.0 | 4.85                   | 5.15                                        |
| 5.5 | 4.312                  | 5.688                                       |
| 6.0 | 3.685                  | 6.315                                       |
| 6.5 | 2.9                    | 7.1                                         |
| 7.0 | 1.765                  | 8.235                                       |
| 7.5 | 0.775                  | 9.225                                       |
| 8.0 | 0.275                  | 9.725                                       |

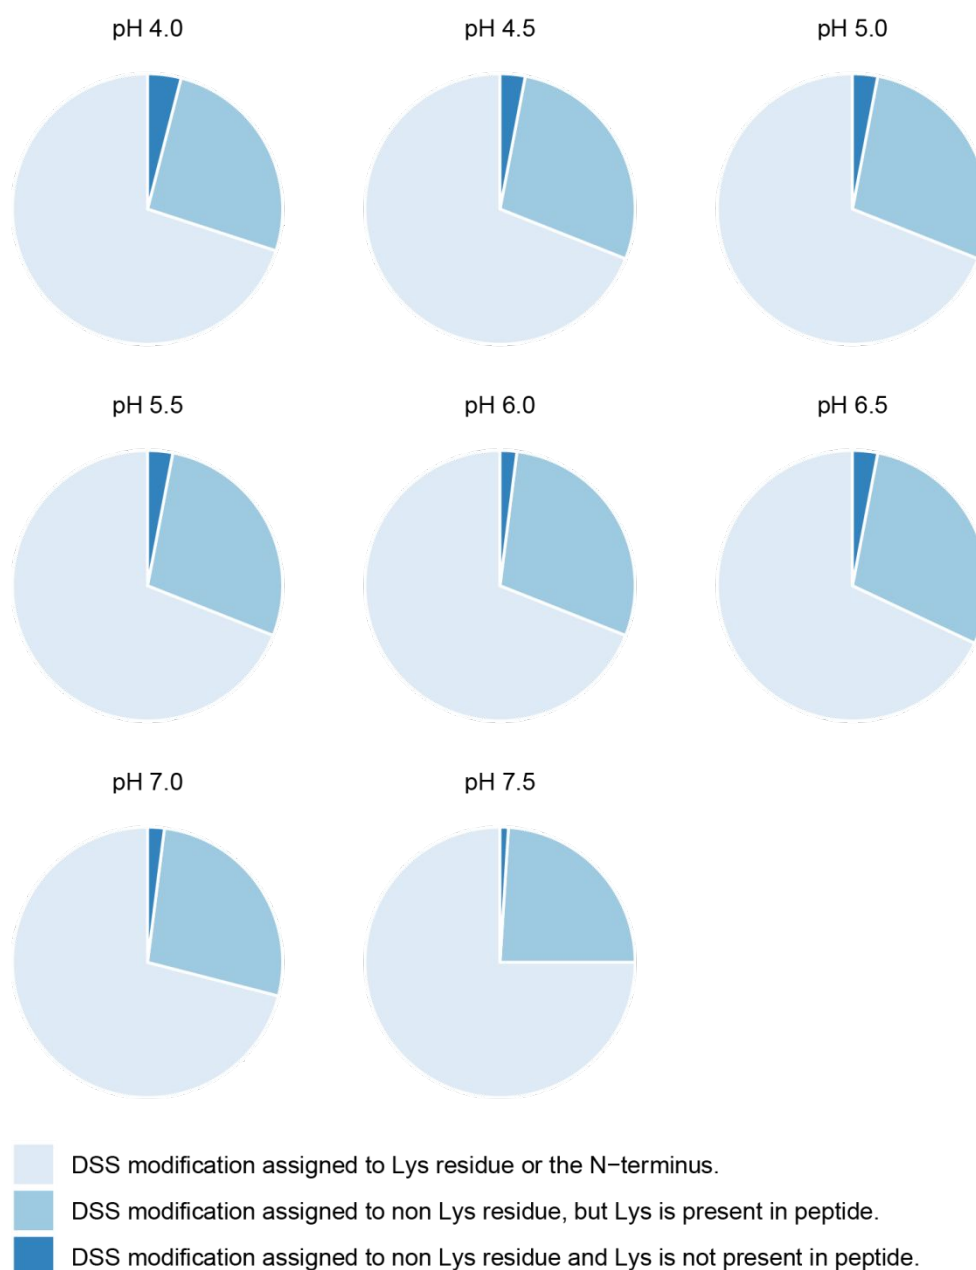

**Figure S1. Specificity of DSS investigated by the MOD<sup>a</sup> algorithm.** The peptides identified as modified by DSS with MOD<sup>a</sup> were binned into three different categories: 1) Peptides for which the DSS modification was assigned to a Lys residue or the N-terminus; 2) Peptides for which the DSS modification was not assigned to a Lys residue or the N-terminus, but the peptide contained a Lys residue; and 3) Peptides for which the DSS modification was not assigned to a Lys residue or the N-terminus, and the peptides did not contain a Lys residue.

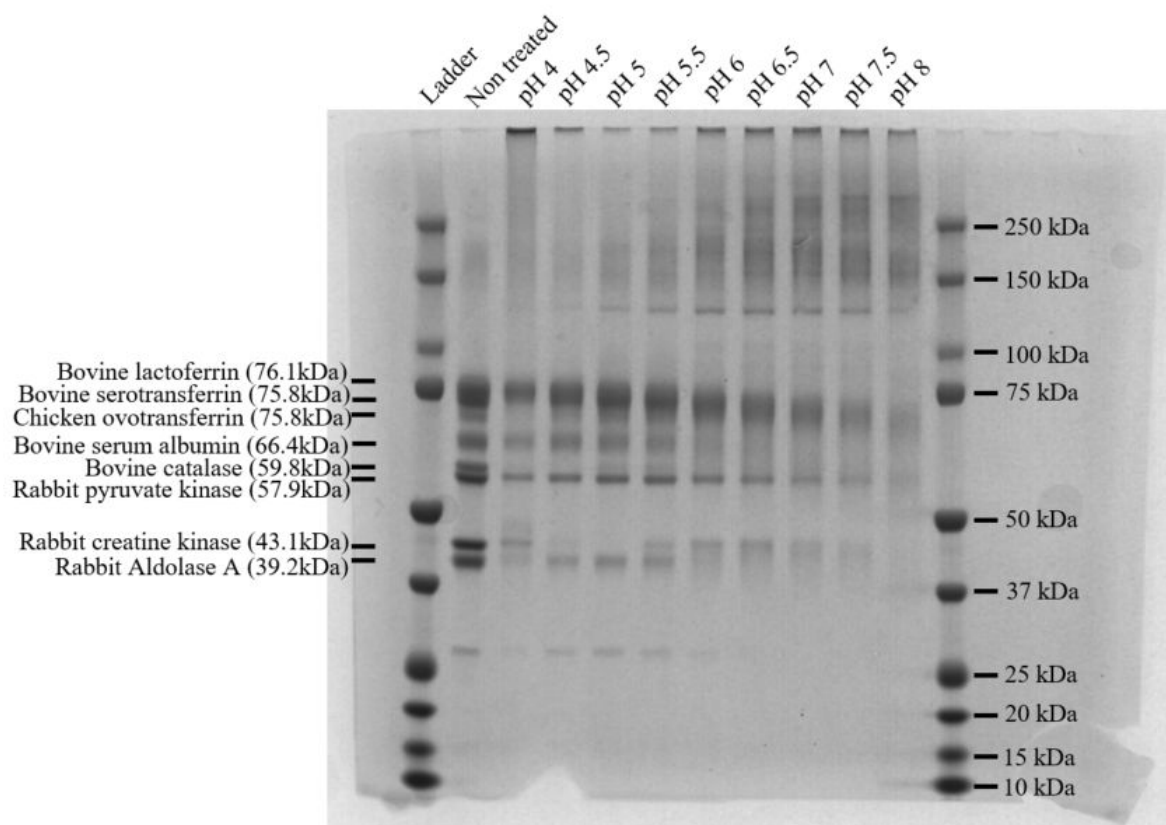

**Figure S2.** SDS-PAGE gel of the cross-linking reaction of the eight model proteins cross-linked at eight different pH conditions.

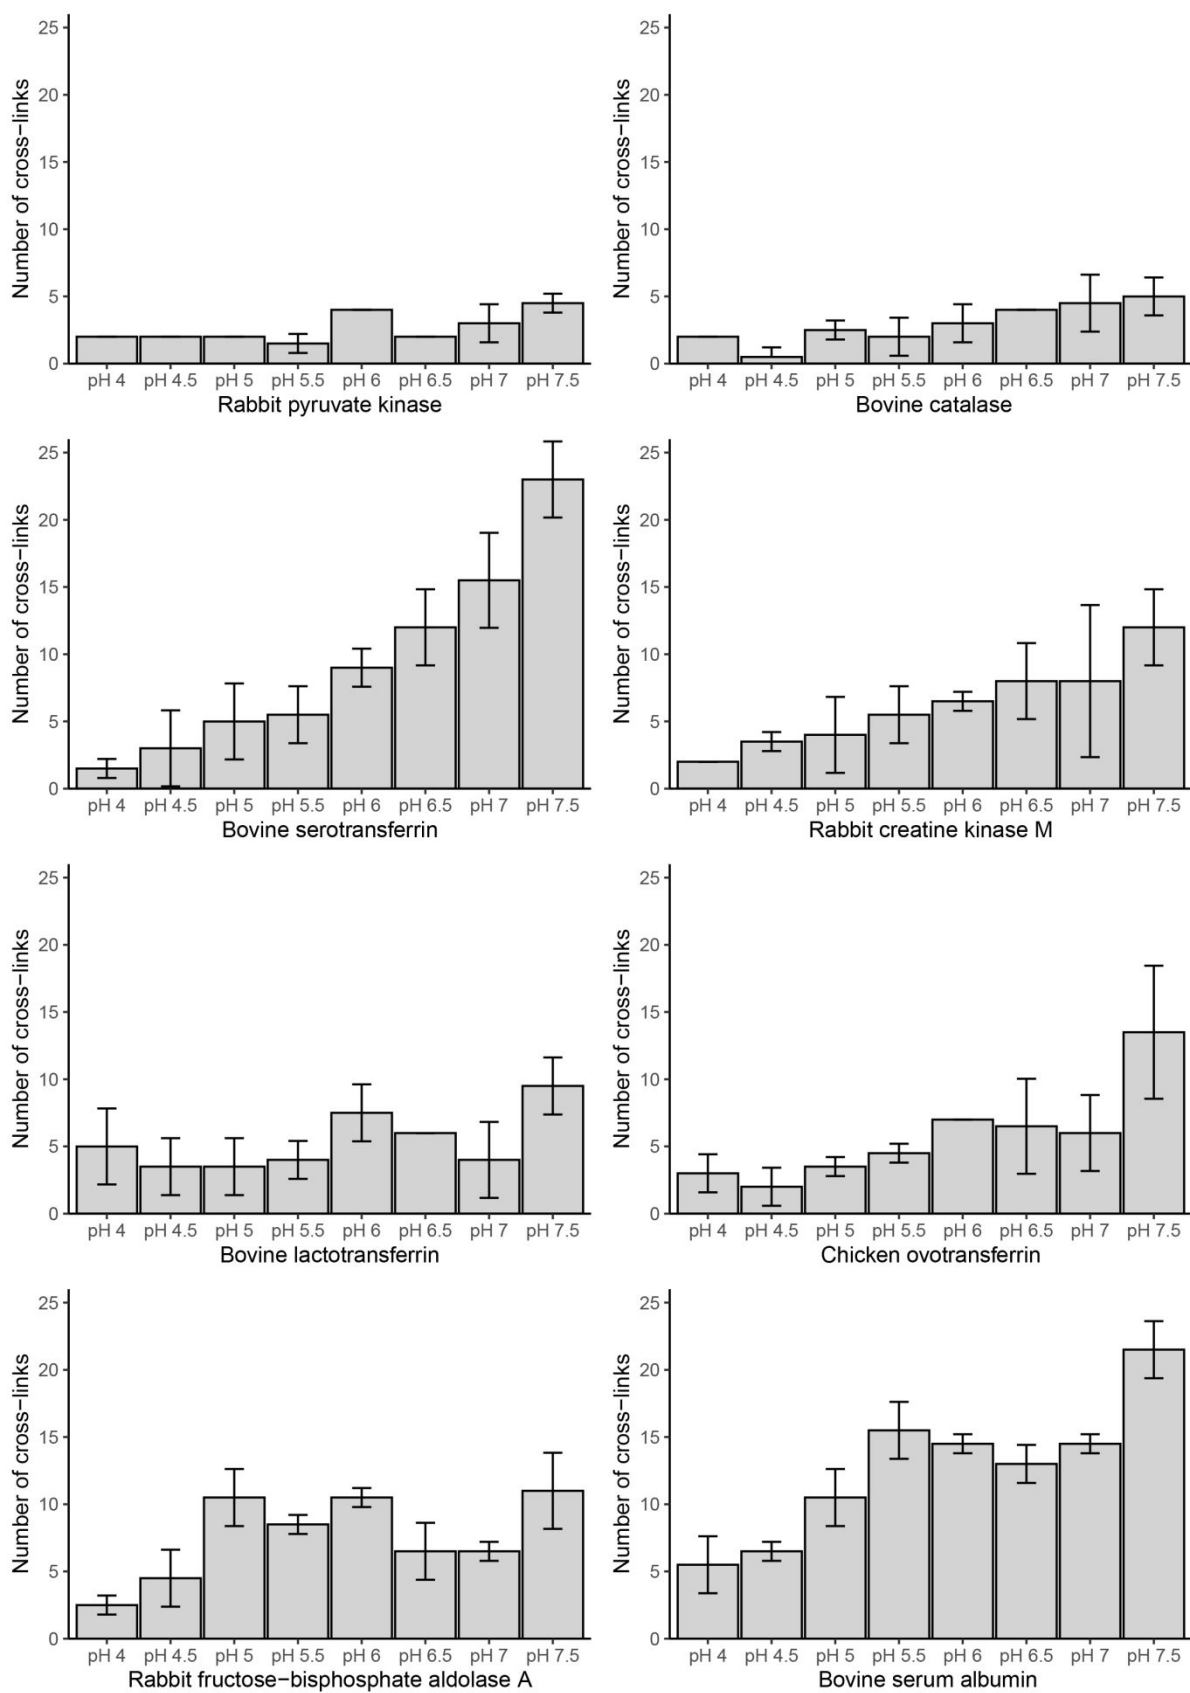

**Figure S3.** Identification of unique cross-linked peptide pairs at different pH conditions for the eight investigated proteins.

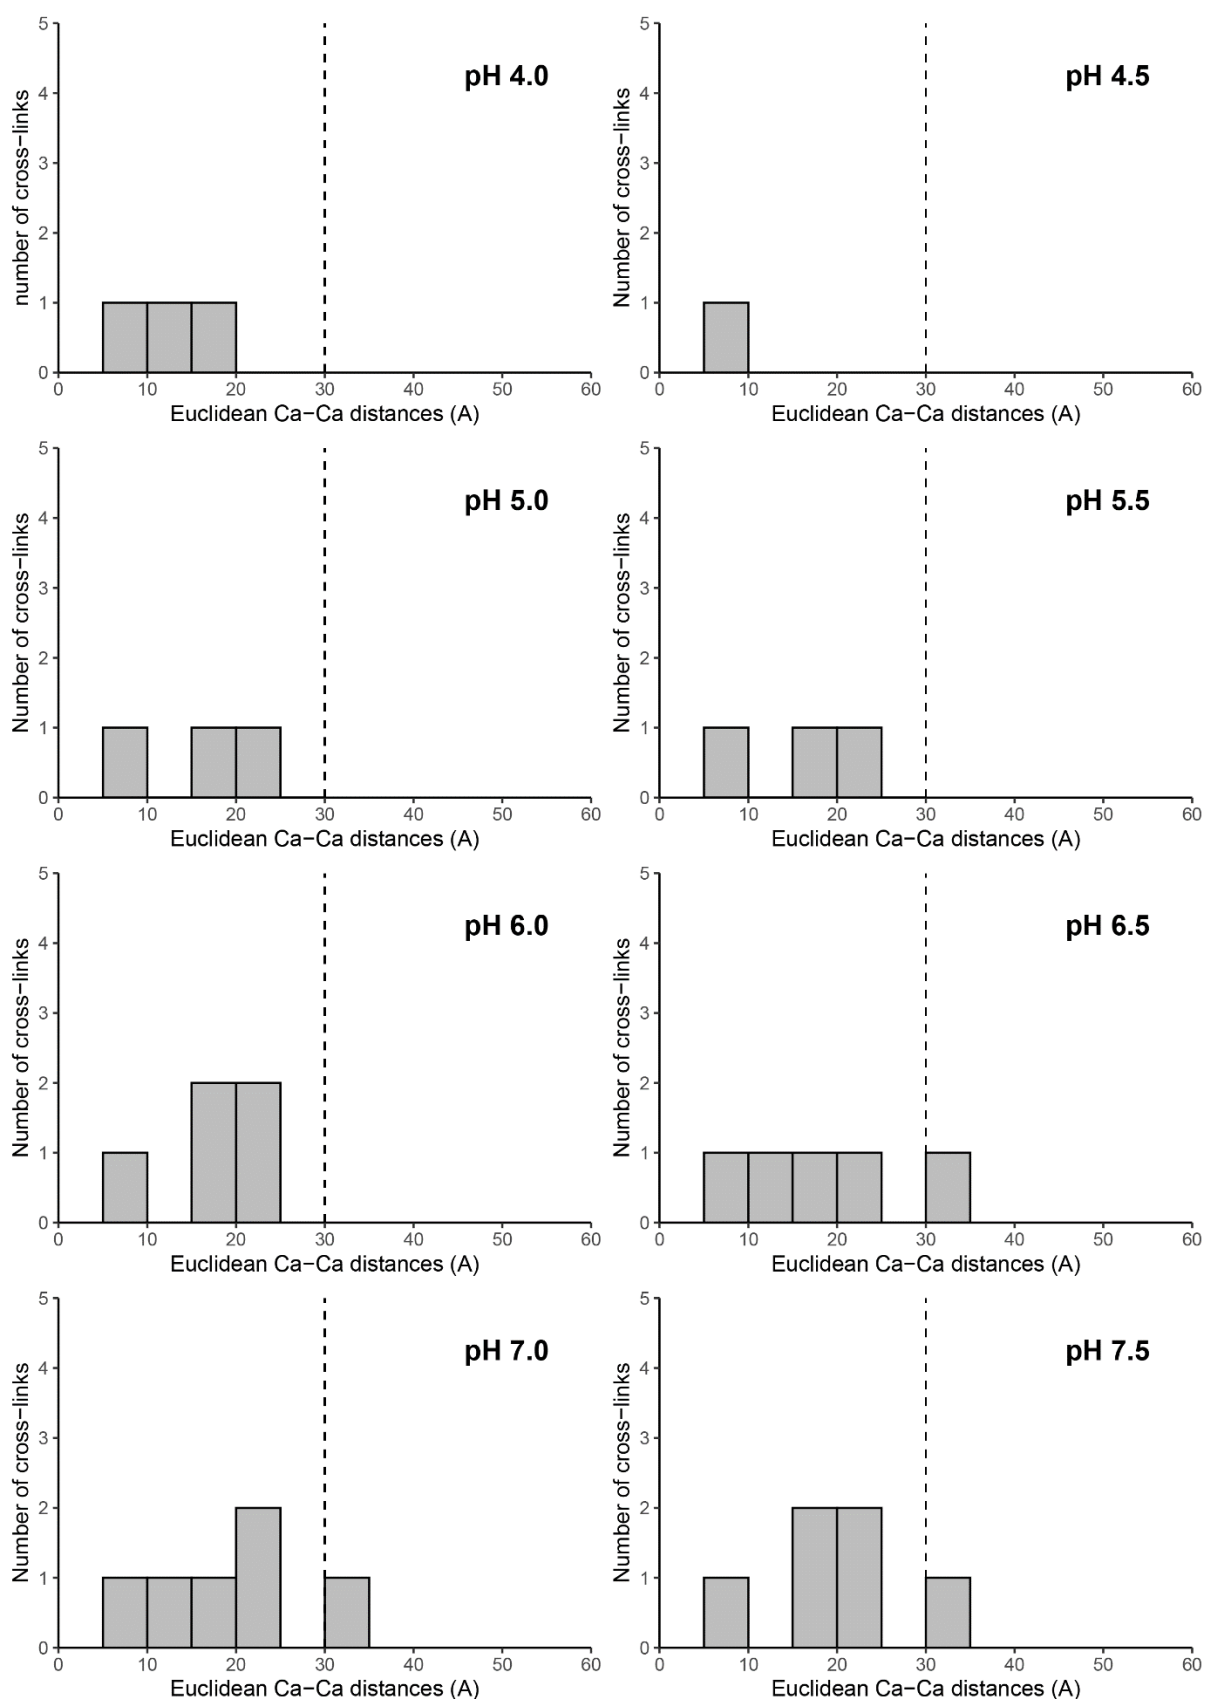

**Figure S4.** Distance distribution of identified unique cross-linked residue pairs from bovine catalase at different pH conditions. The black dotted line (30 Å) marks the commonly used distance cutoff empirically determined for DSS.



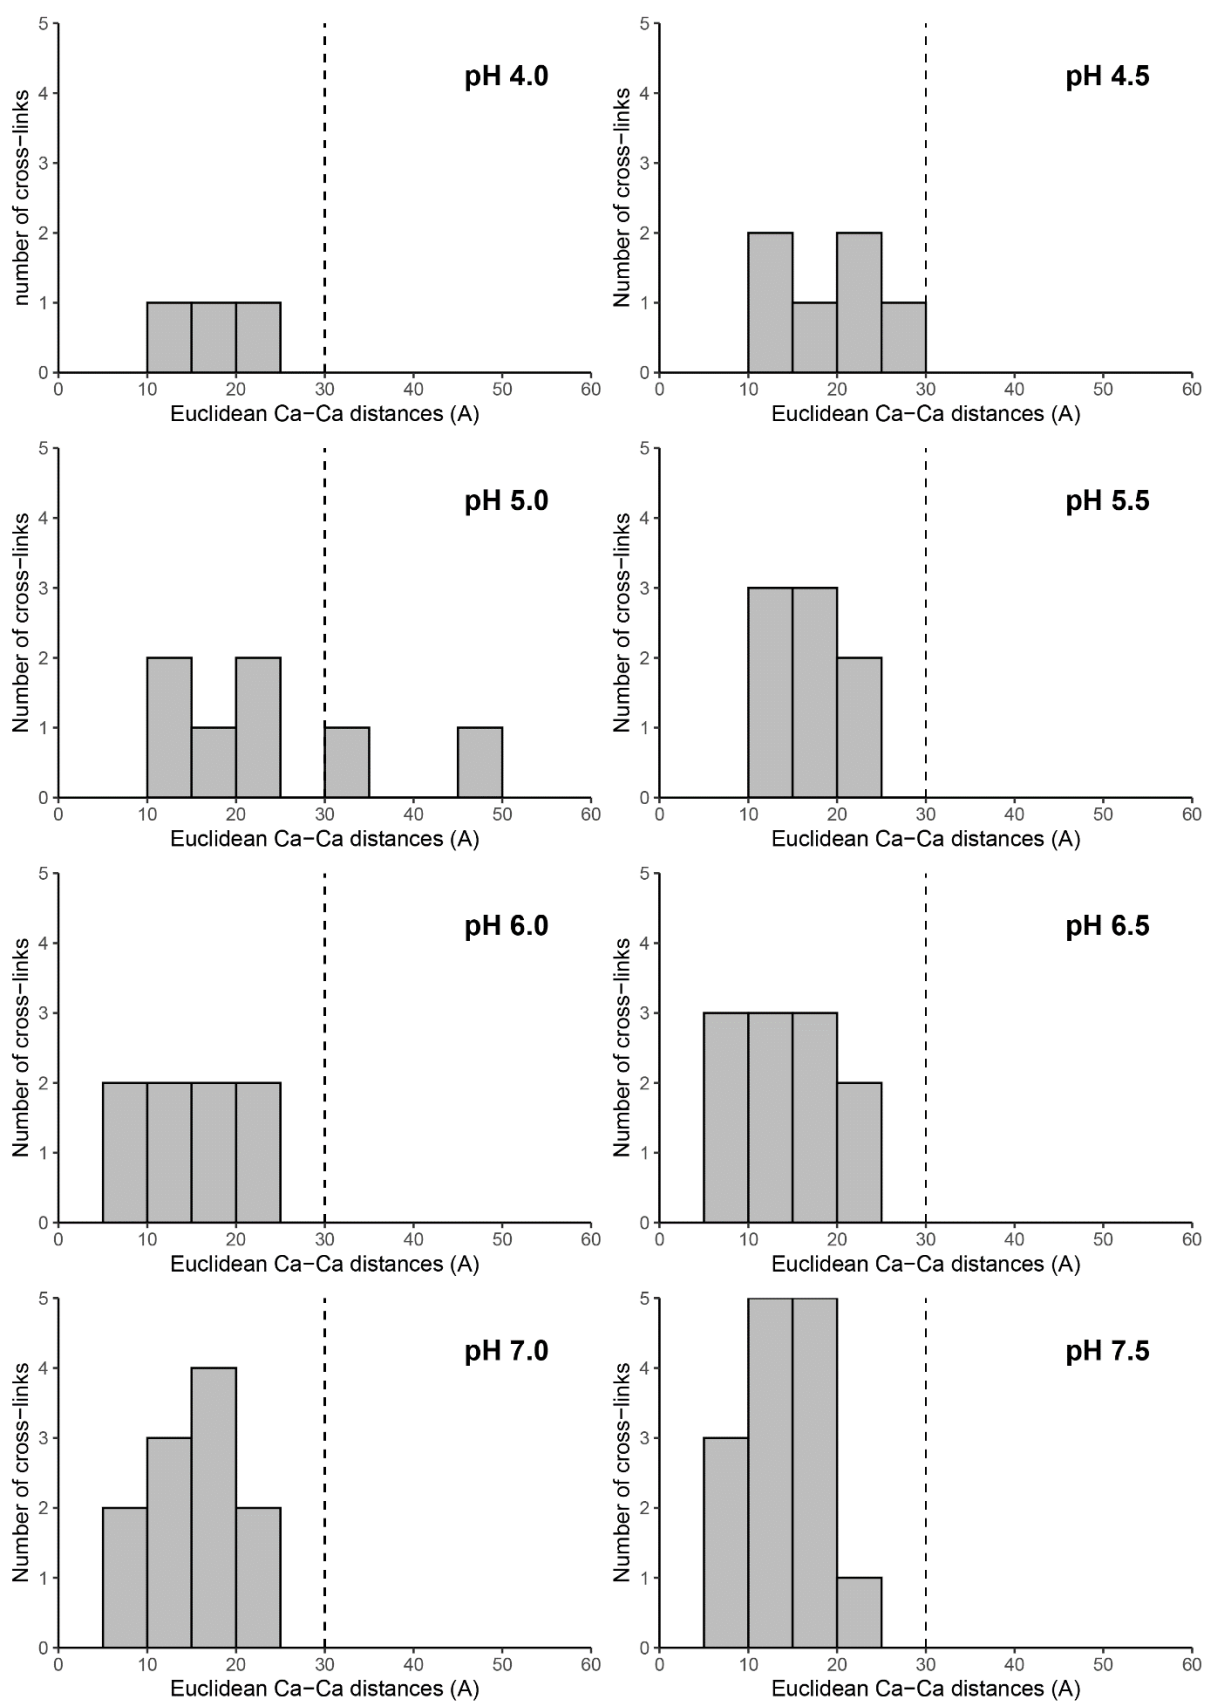

**Figure S5.** Distance distribution of identified unique cross-linked residue pairs from rabbit creatine kinase M-type at different pH conditions. The black dotted line (30 Å) marks the commonly used distance cutoff empirically determined for DSS.

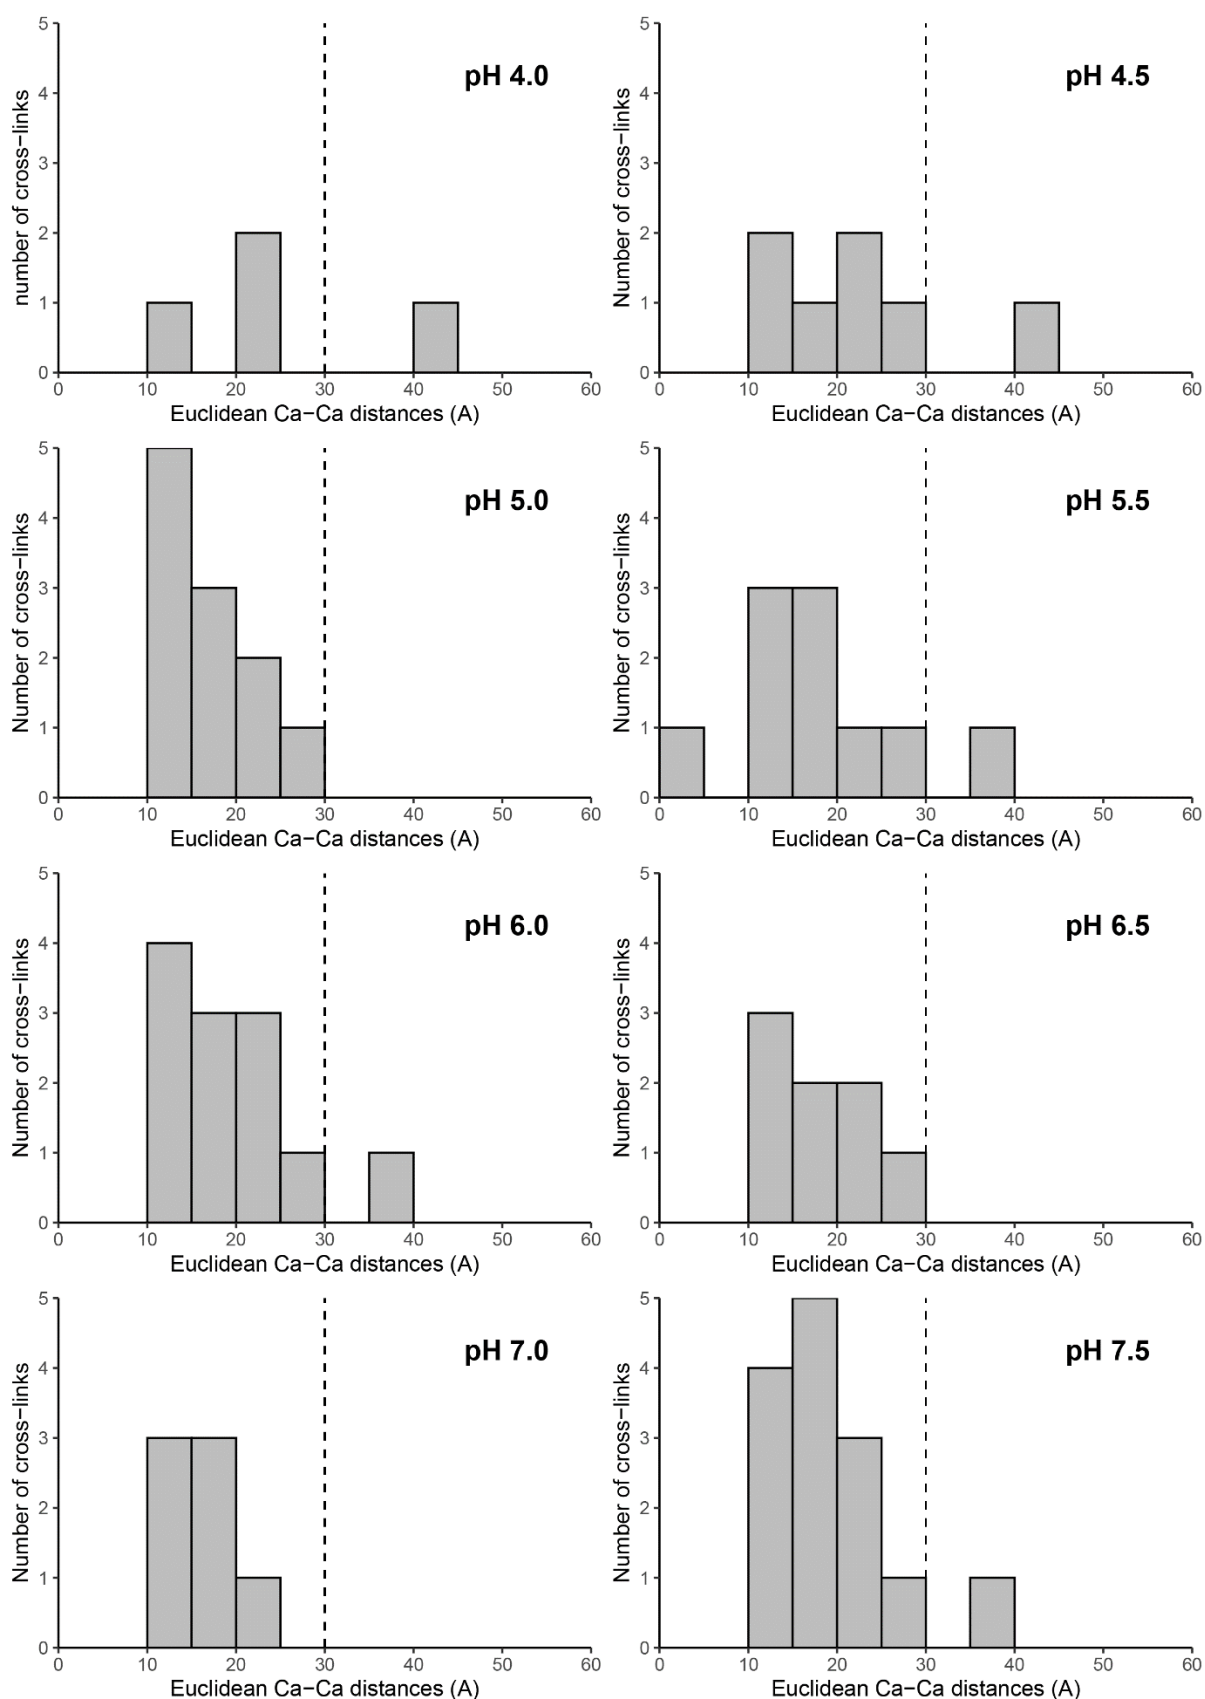

**Figure S6.** Distance distribution of identified unique cross-linked residue pairs from rabbit fructose-bisphosphate aldolase A at different pH conditions. The black dotted line (30 Å) marks the commonly used distance cutoff empirically determined for DSS.

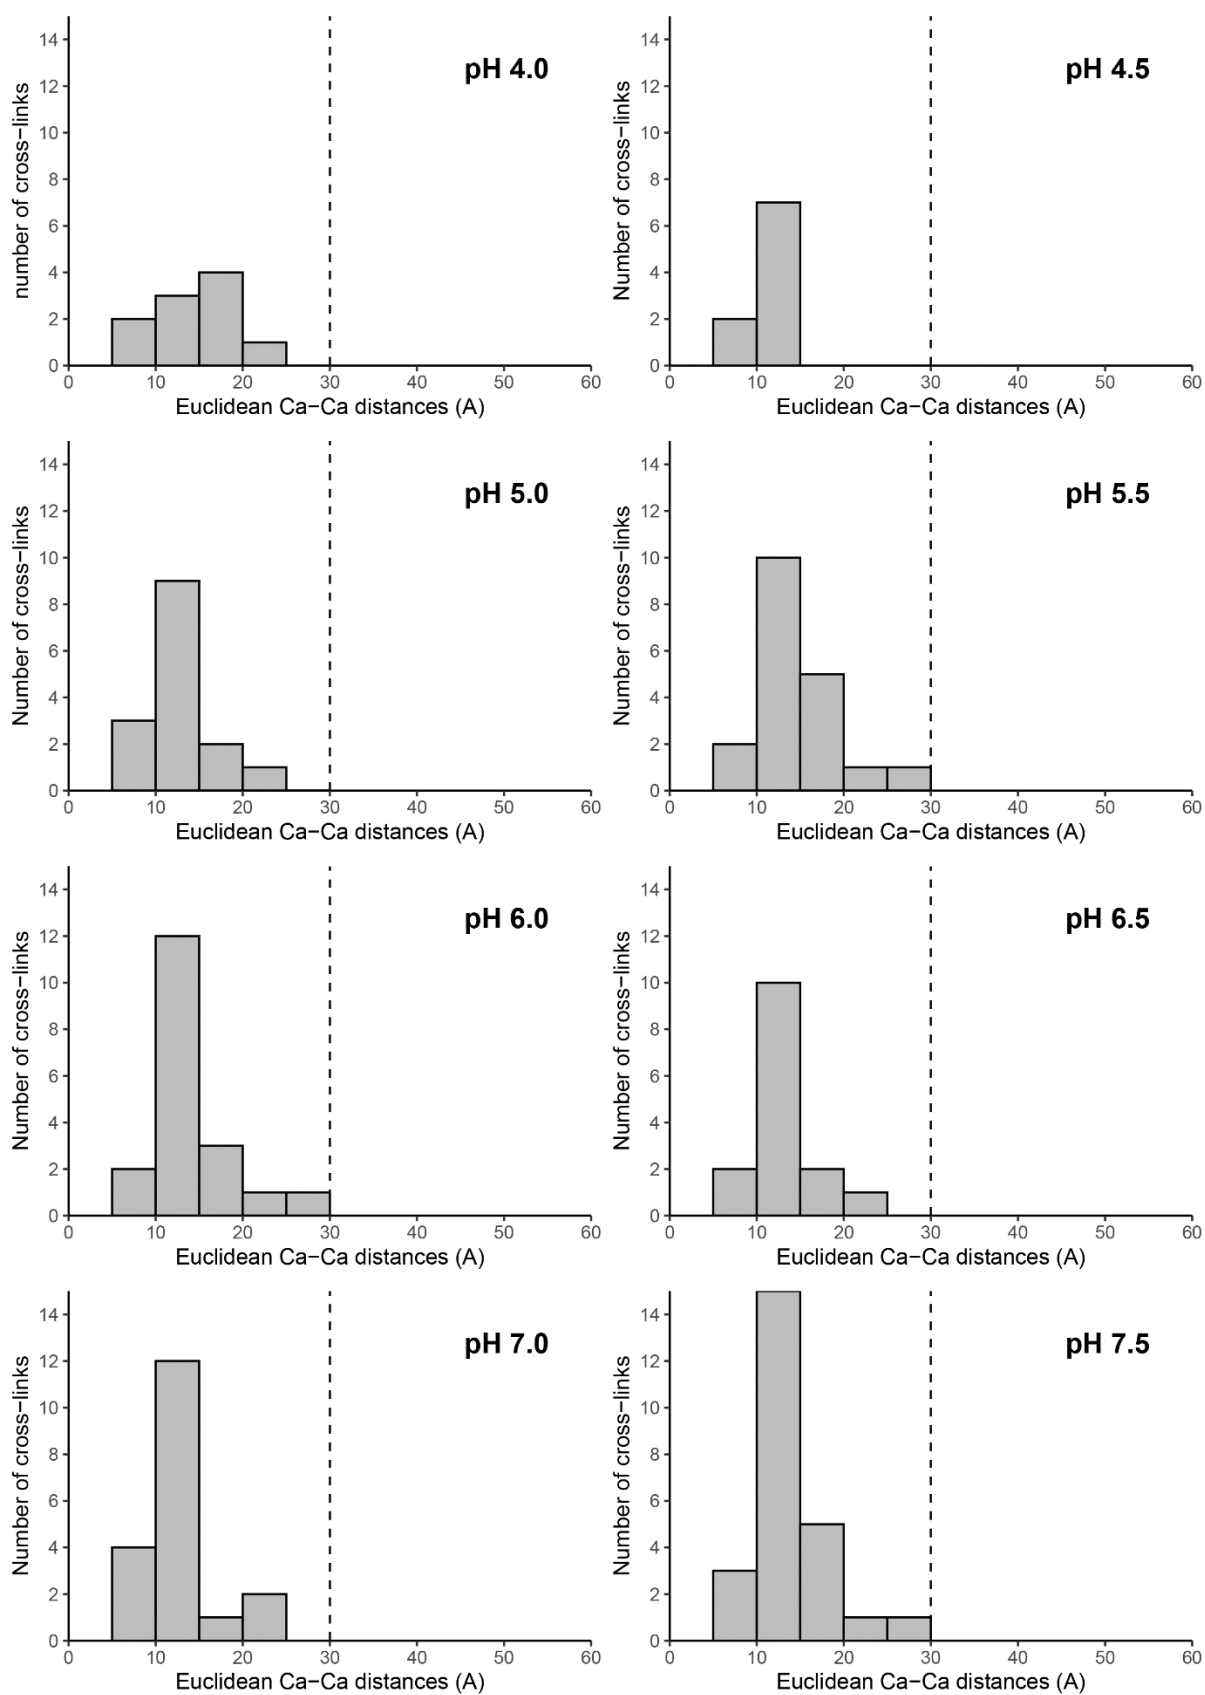

**Figure S7.** Distance distribution of identified unique cross-linked residue pairs from bovine serum albumin at different pH conditions. The black dotted line (30 Å) marks the commonly used distance cutoff empirically determined for DSS.

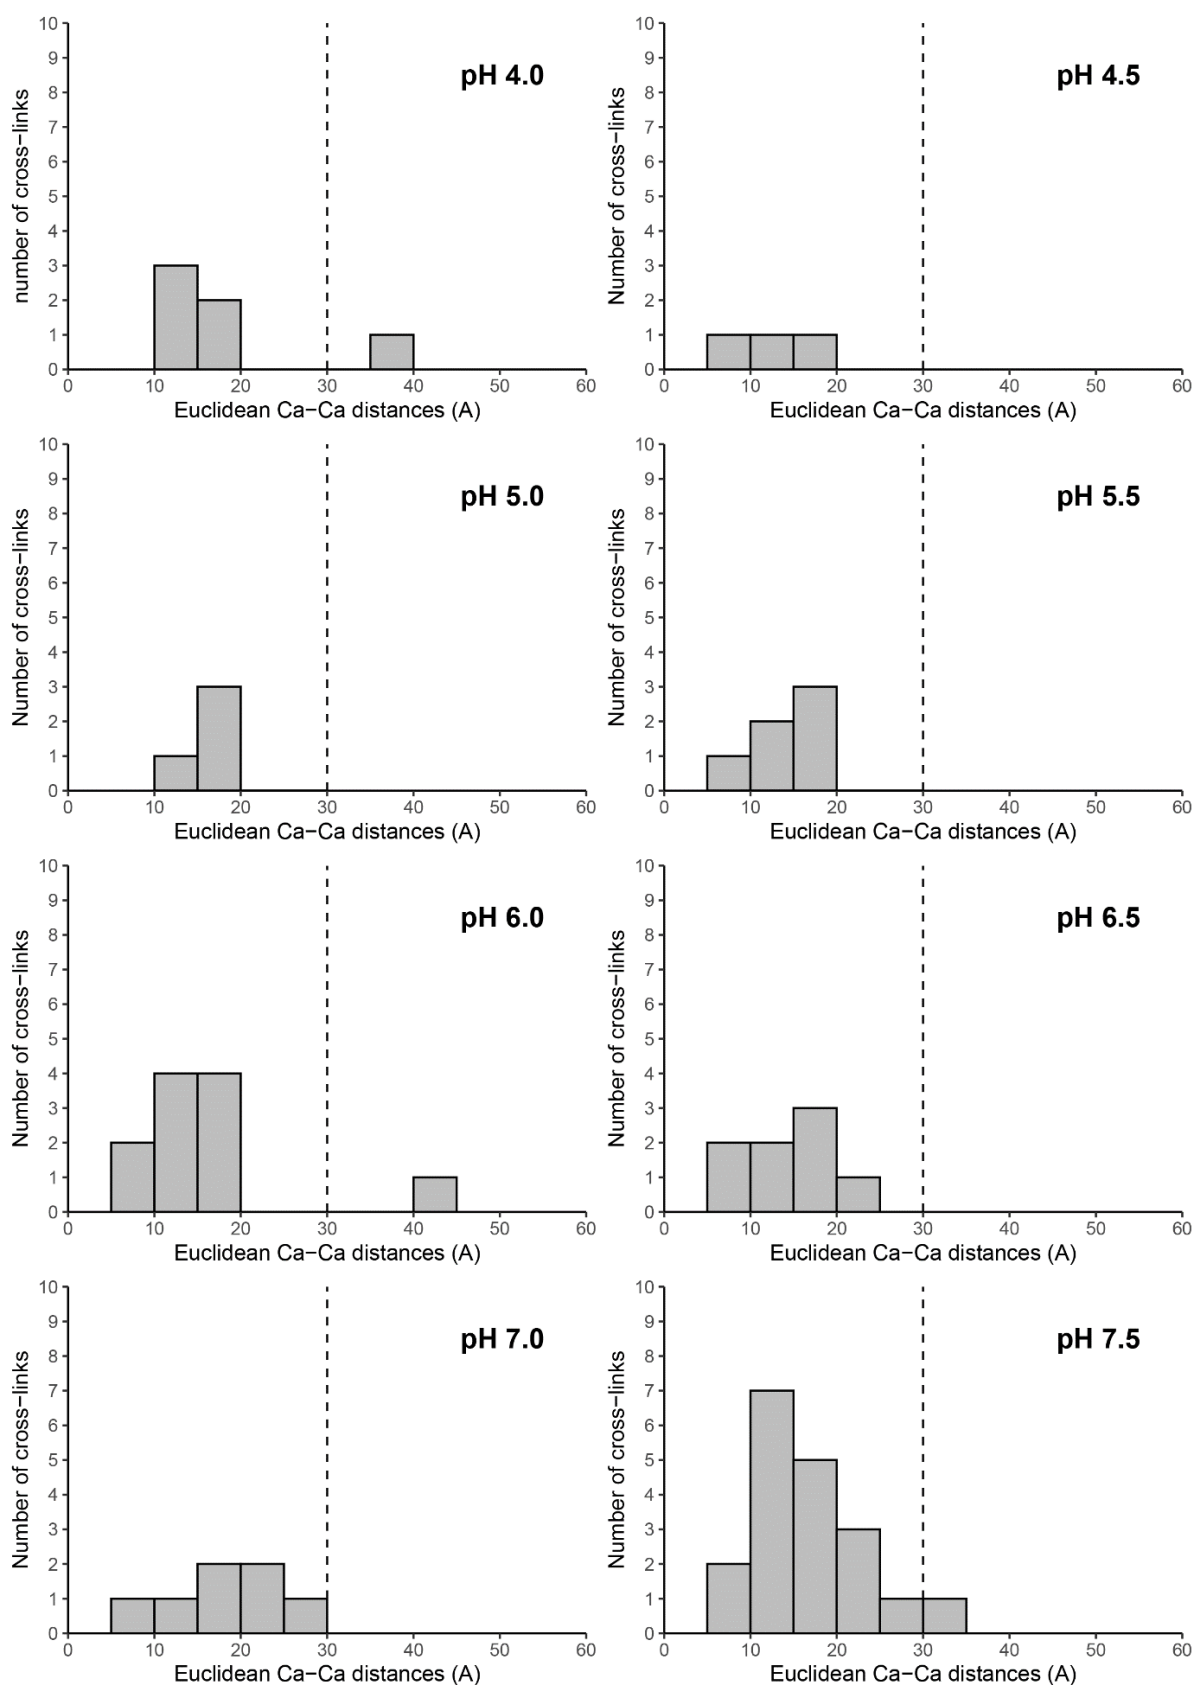

**Figure S8.** Distance distribution of identified unique cross-linked residue pairs from chicken ovotransferrin at different pH conditions. The black dotted line (30 Å) marks the commonly used distance cutoff empirically determined for DSS.

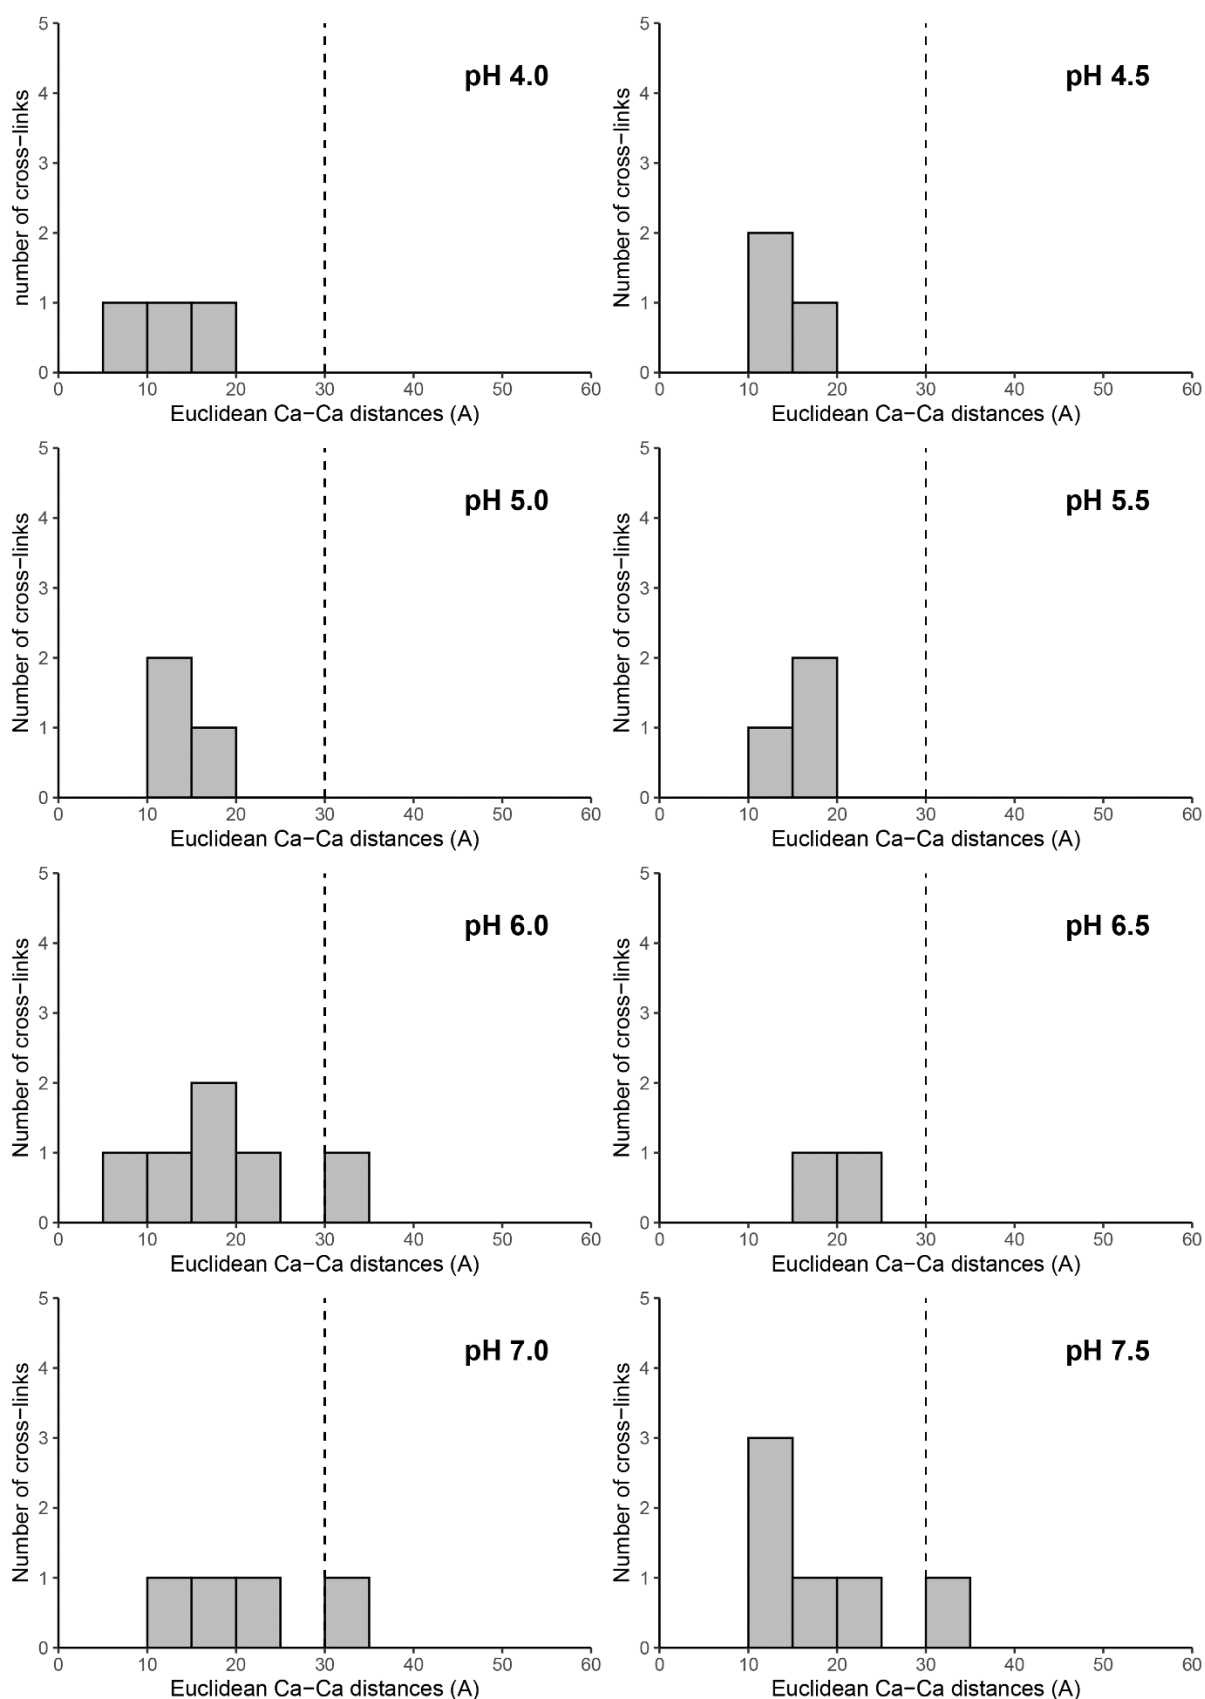

**Figure S9.** Distance distribution of identified unique cross-linked residue pairs from rabbit pyruvate kinase at different pH conditions. The black dotted line (30 Å) marks the commonly used distance cutoff empirically determined for DSS.

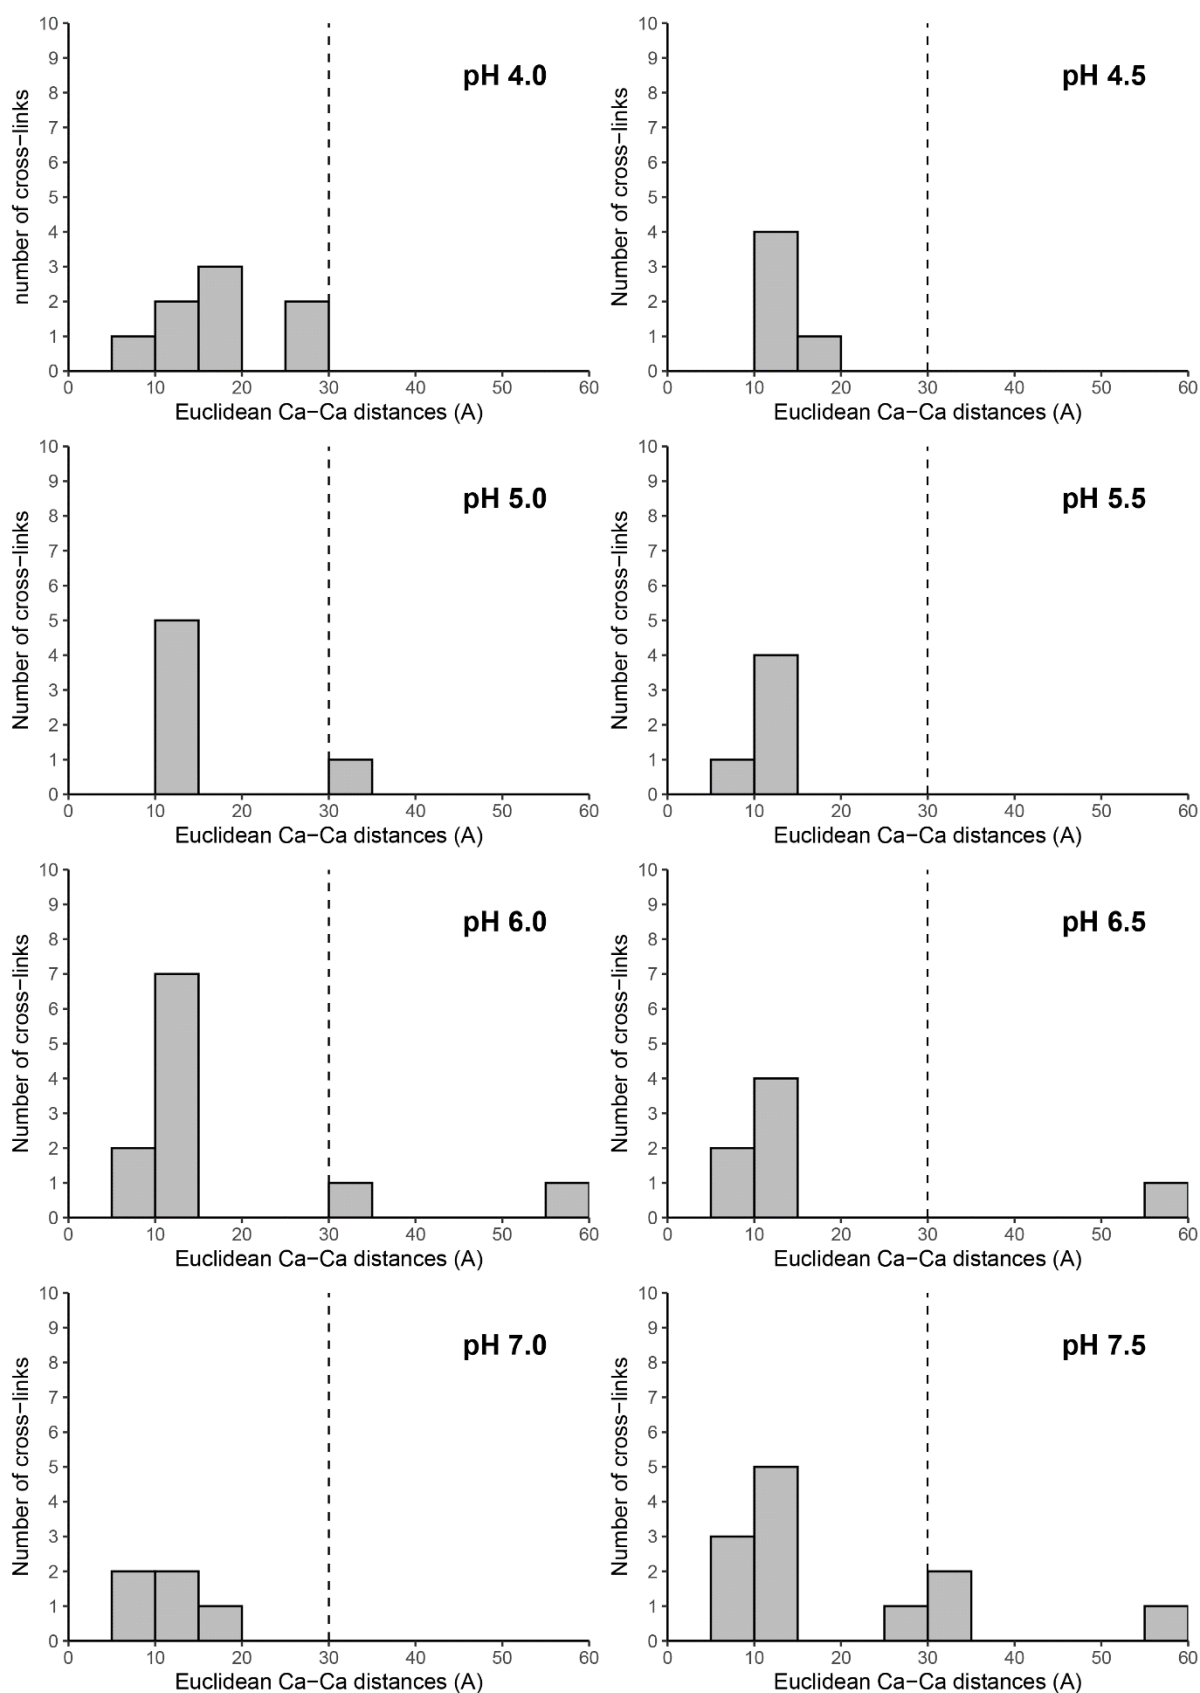

**Figure S10.** Distance distribution of identified unique cross-linked residue pairs from bovine lactotransferrin at different pH conditions. The black dotted line (30 Å) marks the commonly used distance cutoff empirically determined for DSS.

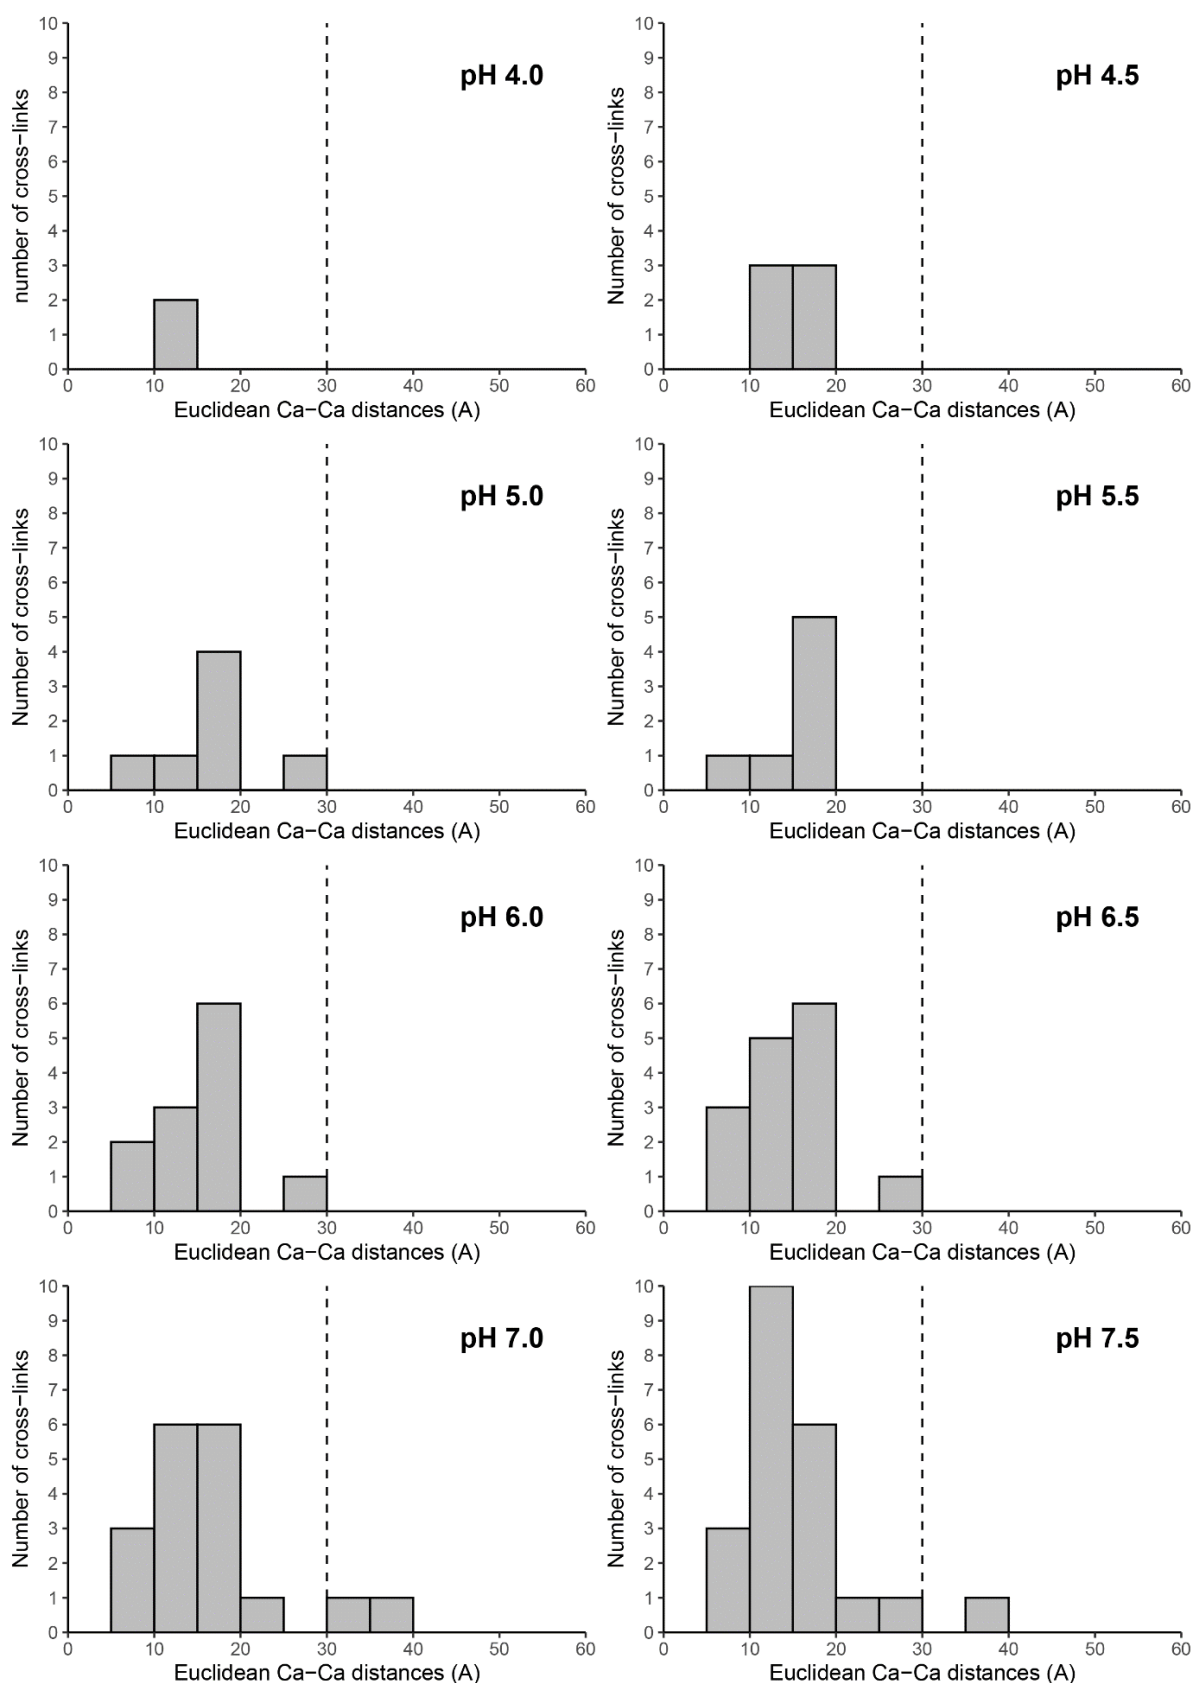

**Figure S11.** Distance distribution of identified unique cross-linked residue pairs from bovine serotransferrin at different pH conditions. The black dotted line (30 Å) marks the commonly used distance cutoff empirically determined for DSS.

## Relative decrease of the amount of deprotonated lysine side chains at pH 6.0 compared to pH 7.5

The first step in the DSS cross-linking reaction of two lysine residues is the nucleophilic attack of a free electron pair on a non-protonated lysine side chain upon the NHS ester:

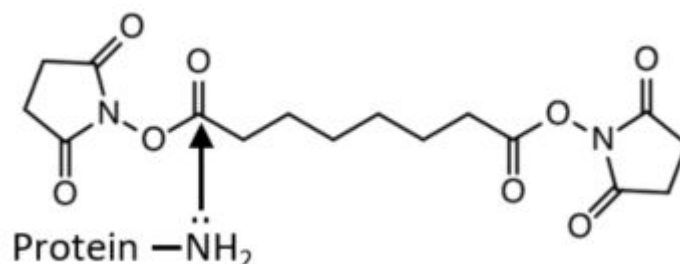

The relative proportion of lysine side chains that are deprotonated at a specific pH condition can be estimated by the Henderson-Hasselbach equation:

$$\text{pH} = \text{pK}_a + \log \left( \frac{[\text{R} - \text{NH}_2]}{[\text{R} - \text{NH}_3^+]}\right),$$

Where the  $\text{pK}_a$  of the lysine side chain is 10.82.\*

The relationship between the deprotonated and protonated form of the lysine side chain at pH 6.00 and pH 7.50 can now be estimated.

At pH 6.00:

$$6.00 = 10.82 + \log \left( \frac{[\text{R} - \text{NH}_2]}{[\text{R} - \text{NH}_3^+]}\right) \Leftrightarrow \frac{[\text{R} - \text{NH}_2]}{[\text{R} - \text{NH}_3^+]} = 1.51 \times 10^{-5}$$

At pH 7.50:

$$7.5 = 10.82 + \log \left( \frac{[\text{R} - \text{NH}_2]}{[\text{R} - \text{NH}_3^+]}\right) \Leftrightarrow \frac{[\text{R} - \text{NH}_2]}{[\text{R} - \text{NH}_3^+]} = 4.79 \times 10^{-4}$$

The fold decrease of the amount of deprotonated lysine side chains can now be estimated from pH 7.5 to 6.0:

$$\text{fold decrease} = \frac{4.79 \times 10^{-4}}{1.51 \times 10^{-5}} = 31.6$$

\* Harris, D.C.: Quantitative Chemical Analysis. W. H. Freeman and Company, New York, USA (2010)



Similar calculations can be performed for comparison of all investigated pH conditions:

| Decrease in pH | Fold decrease in the amount of deprotonated lysine side chains |
|----------------|----------------------------------------------------------------|
| 0.5            | 3.2                                                            |
| 1.0            | 10.0                                                           |
| 1.5            | 31.6                                                           |
| 2.0            | 100.0                                                          |
| 2.5            | 316.2                                                          |
| 3.0            | 1000.0                                                         |
| 3.5            | 3162.3                                                         |
